# Supplementary material for: Characterization of the ADP-β-d-manno-heptose biosynthetic enzymes from two pathogenic Vibrio strains
Source: Springer Nature journal article supplement (doi:10.1007/s00253-024-13108-3), 2024-03-18
Supplement: MOESM1 [file 253_2024_13108_MOESM1_ESM.pdf]

# **Characterization of the ADP- $\beta$ -D-manno-heptose biosynthetic enzymes from two pathogenic *Vibrio* strains**

Zhaoxiang Shi<sup>1,†</sup> · Yue Tang<sup>2,†</sup> · Zhenyi Wang<sup>3</sup> · Min Wang<sup>4</sup> · Zijian Zhong<sup>2,5</sup> · Jingming Jia<sup>1</sup> · Yihua Chen<sup>2,5,\*</sup>

<sup>1</sup>School of Traditional Chinese Materia Medica, Shenyang Pharmaceutical University, Shenyang, 117004, China.

<sup>2</sup>State Key Laboratory of Microbial Resources, Institute of Microbiology, Chinese Academy of Sciences, Beijing, 100101, China.

<sup>3</sup>RDFZ Xishan School, Beijing, 100193, China.

<sup>4</sup>School of Biotechnology and Health Sciences, Wuyi University, Jiangmen, 529020, China.

<sup>5</sup>University of Chinese Academy of Sciences, Beijing, 100049, China.

\*Corresponding author: Email: chenjihua@im.ac.cn (Y.C.)

†These authors contributed equally to this work.

## Chemical synthesis of $\beta$ -D-mannose 1-phosphate

In brief, peracetylated D-mannose (**1**) was obtained by acetylation of D-mannose in the presence of 4-dimethylaminopyridine (DMAP), pyridine, and acetic anhydride ( $\text{Ac}_2\text{O}$ ). And, selective deacetylation at C-1 position of **1** by treatment with *N,N*-diisopropylethylamine (DIPEA) and ammonium acetate yielded **2**, which was phosphorylated using diphenyl chlorophosphate and DMAP in dichloromethane (DCM) to furnish **3**. The deprotection of phenyl groups of **3** was achieved using catalyst  $\text{PtO}_2$  under  $\text{H}_2$  and the resultant product was further subjected to deacetylation in the presence of MeOH,  $\text{Et}_3\text{N}$ , and  $\text{H}_2\text{O}$  to afford the desired  $\beta$ -D-mannose 1-phosphate (Sabesan and Neira 1992).

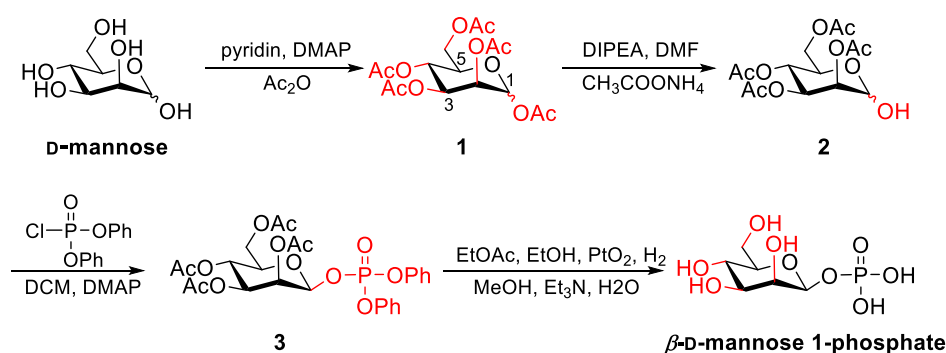

Scheme 1 Synthesis of  $\beta$ -D-mannose 1-phosphate.

## Synthesis of compound 1

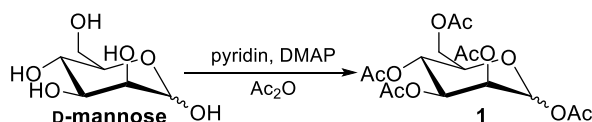

Acetic anhydride (2.68 mL, 28.0 mmol) and 4-dimethylaminopyridine (DMAP) (0.14 g, 1.14 mmol) were added to a solution of D-mannose (0.50 g, 2.80 mmol) in pyridine (4.58 mL, 57.0 mmol) at  $0^\circ\text{C}$ . The resulting mixture was stirred at room temperature for 3 hours. The product was diluted by 50 mL dichloromethane, washed with  $2 \times 50$  mL sat. aq.  $\text{NaHCO}_3$ , and 50 mL brine, sequentially. After dried over sodium sulfate, the solution was filtered and concentrated. The residue was purified by silica-gel column chromatography to obtain compound **1** (0.90 g, 83%).

## Synthesis of compound 2

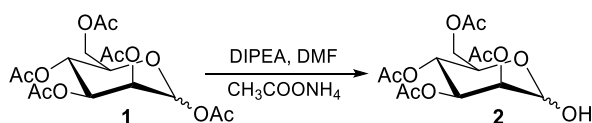

A solution of **1** (0.2 g, 0.51 mmol) in a mixture of dry DMF (10 mL) and *N,N*-diisopropylethylamine (0.42 mL, 2.50 mmol) with ammonium acetate (0.16 g, 2.04 mmol), which was prewashed with dry ether and dried over high vacuum pump overnight at 40 °C, was stirred overnight. After removing the insoluble crystals of ammonium acetate by filtration, the reaction mixture was diluted with 50 mL CH<sub>2</sub>Cl<sub>2</sub>, and then washed with 2 × 50 mL 1M HCl, 2 × 50 mL sat. aq. NaHCO<sub>3</sub>, 50 mL brine sequentially, subsequently. It was then dried over MgSO<sub>4</sub> and concentrated under reduced pressure. Finally, the residue was purified by silica-gel column chromatography to give compound **2** (0.12 g, 68%).

### Synthesis of compound **3**

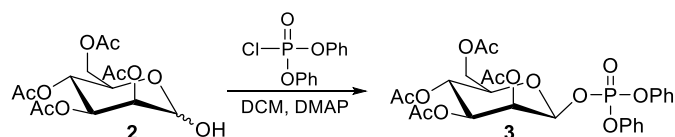

To a solution of compound **2** (0.1 g) in CH<sub>2</sub>Cl<sub>2</sub> (3 mL) containing DMAP (0.08 g), diphenyl chlorophosphate (0.14 mL) in CH<sub>2</sub>Cl<sub>2</sub> (1 mL) was added during 1 h at room temperature. After 2 h, the products of the reaction were purified by silica-gel column chromatography to afford compound **3** (0.12 g, 70%).

### Synthesis of $\beta$ -D-mannose 1-phosphate.

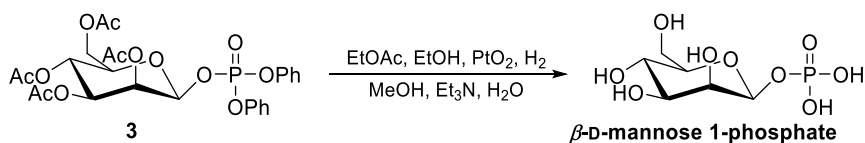

A solution of compound **3** (0.1 g) in 2 mL EtOAc-EtOH (1:1) was hydrogenated in the presence of PtO<sub>2</sub> catalyst (2 mg) for 16 h. After removing the catalyst by filtration, the solution was neutralized with Et<sub>3</sub>N and evaporated to give a syrup, which was dissolved in 4 mL MeOH-Et<sub>3</sub>N-H<sub>2</sub>O (2:1:1) and kept for 5 days at 0 °C. After evaporation, the dried residue was re-dissolved in water, lyophilized, and purified by sephadex LH-20 to afford  $\beta$ -D-mannose 1-phosphate as a colorless solid (0.03 g, 67% yield).

### $\beta$ -D-mannose 1-phosphate

<sup>1</sup>H NMR (500 MHz, D<sub>2</sub>O):  $\delta$  5.26 (dd, *J* = 1.6 and 8.0 Hz, 1H, H-1), 3.85 (m, 1H, H-2), 3.80 (m, 1H, H-4), 3.78 (m, 1H, H-3), 3.75, 3.64 (m, 2H, H-6), 3.53 (m, 1H, H-5).

HRMS (*m/z*): calculated for C<sub>6</sub>H<sub>14</sub>O<sub>9</sub>P<sup>+</sup> [M+H]<sup>+</sup>: 261.0370, found: 261.0380.

HRMS, <sup>1</sup>H NMR, and COSY spectra, see Fig. S1.

### ADP- $\beta$ -D-mannose

<sup>1</sup>H NMR (500 MHz, D<sub>2</sub>O):  $\delta$  8.60 (s, 1H, H-1), 8.38 (s, 1H, H-5), 6.17 (d, *J* = 5.5 Hz, 1H, H-1'), 5.26 (d, *J* = 8.4 Hz,

1H, H-1''), 4.77 (m, 1H, H-2'), 4.54 (m, 1H, H-3'), 4.41 (m, 1H, H-4'), 4.26 (m, 2H, H-5'), 4.08 (d,  $J = 3.2$  Hz, 1H, H-2''), 3.90, 3.70 (m, 2H, H-6'') 3.67 (dd,  $J = 3.2$  and 9.6 Hz, 1H, H-3''), 3.55 (t,  $J = 9.6$  Hz, 1H, H-4''), 3.40 (m, 1H, H-5'').

$^{13}\text{C}$  NMR (125 MHz,  $\text{D}_2\text{O}$ ):  $\delta$  151.6, 148.6, 147.2, 141.6, 118.5, 95.6, 87.6, 84.0, 76.8, 74.5, 72.4, 70.6, 70.2, 66.4, 65.1, 61.0.

HRMS ( $m/z$ ): calculated for  $\text{C}_{16}\text{H}_{24}\text{N}_5\text{O}_{15}\text{P}_2^-$  [M-H] $^-$ : 588.0750, found: 588.0754.

HRMS,  $^1\text{H}$  NMR and  $^{13}\text{C}$  NMR, COSY, and NOE spectra, see Fig. S2.

**Table S1 Bacterial strains and plasmids used in this study.**

| Strains or plasmids                     | Characteristics (protein ID)                                                                                                 | Reference or sources |
|-----------------------------------------|------------------------------------------------------------------------------------------------------------------------------|----------------------|
| <b><i>E. coli</i></b>                   |                                                                                                                              |                      |
| JM109                                   | General cloning host                                                                                                         | Invitrogen           |
| BL21 (DE3) $\Delta gmhA_{EC}$           | Host strain for protein expression                                                                                           | (Tang et al. 2022)   |
| $\Delta gmhB_{EC} \Delta hldE_{EC}$     |                                                                                                                              |                      |
| <i>V. parahaemolyticus</i> CGMCC 1.1997 | Template for cloning the encoding genes of ADP- $\beta$ -D-manno-heptose biosynthesis                                        | This study           |
| <b>Plasmids</b>                         |                                                                                                                              |                      |
| pET28a                                  | Kan <sup>r</sup> , protein expression vector                                                                                 | Novagen              |
| pET28a/GmhA <sub>VC</sub>               | Kan <sup>r</sup> , for the expression of <i>V. cholerae</i> O1 2010EL-1786 derived GmhA <sub>VC</sub> (OR656557)             | This study           |
| pET28a/GmhB <sub>VC</sub>               | Kan <sup>r</sup> , for the expression of <i>V. cholerae</i> O1 2010EL-1786 derived GmhB <sub>VC</sub> (OR656558)             | This study           |
| pET28a/HldE <sub>VC</sub>               | Kan <sup>r</sup> , for the expression of <i>V. cholerae</i> O1 2010EL-1786 derived HldE <sub>VC</sub> (OR656559)             | This study           |
| pET28a/HldD <sub>VC</sub>               | Kan <sup>r</sup> , for the expression of <i>V. cholerae</i> O1 2010EL-1786 derived HldD <sub>VC</sub> (OR656560)             | This study           |
| pET28a/GmhA <sub>VP</sub>               | Kan <sup>r</sup> , for the expression of <i>V. parahaemolyticus</i> CGMCC 1.1997 derived GmhA <sub>VP</sub> (WP_005457680.1) | This study           |
| pET28a/GmhB <sub>VP</sub>               | Kan <sup>r</sup> , for the expression of <i>V. parahaemolyticus</i> CGMCC 1.1997 derived GmhB <sub>VP</sub> (WP_005459163.1) | This study           |
| pET28a/HldE <sub>VP</sub>               | Kan <sup>r</sup> , for the expression of <i>V. parahaemolyticus</i> CGMCC 1.1997 derived HldE <sub>VP</sub> (WP_005497052.1) | This study           |
| pET28a/HldD <sub>VP</sub>               | Kan <sup>r</sup> , for the expression of <i>V. parahaemolyticus</i> CGMCC 1.1997 derived HldD <sub>VP</sub> (WP_015296139.1) | This study           |
| pET28a/GmhA <sub>EC</sub>               | Kan <sup>r</sup> , for the expression of <i>E. coli</i> BL21(DE3) derived GmhA <sub>EC</sub> (WP_000284050.1)                | (Tang et al. 2018)   |
| pET28a/GmhB <sub>EC</sub>               | Kan <sup>r</sup> , for the expression of <i>E. coli</i> BL21(DE3) derived GmhB <sub>EC</sub> (WP_001140174.1)                | (Tang et al. 2018)   |
| pET28a/HldE <sub>EC</sub>               | Kan <sup>r</sup> , for the expression of <i>E. coli</i> BL21(DE3) derived HldE <sub>EC</sub> (WP_000869178.1)                | (Tang et al. 2018)   |
| pET28a/HldD <sub>EC</sub>               | Kan <sup>r</sup> , for the expression of <i>E. coli</i> BL21(DE3) derived HldD <sub>EC</sub> (WP_000587764.1)                | (Tang et al. 2018)   |
| pET28a/HygP                             | Kan <sup>r</sup> , for the expression of <i>E. coli</i> BL21(DE3) derived HygP (WP_063817660.1)                              | (Tang et al. 2018)   |

**Table S2 Primers used in this study.**

| Primers   | Sequence (5' to 3')                          | Uses                                                                                  |
|-----------|----------------------------------------------|---------------------------------------------------------------------------------------|
| pET28a-1  | AAC TCGAGCACCACCACCACC                       | Confirmation of pET28a derivatives                                                    |
| pET28a-2  | GGATCCGCGACCCATTTGCT                         | For the expression of GmhA <sub>VP</sub> from <i>V. parahaemolyticus</i> CGMCC 1.1997 |
| GmhA-VP-1 | AGCAAATGGGTCGCGGATCCATGTACCAAGATCTGATTAG     |                                                                                       |
| GmhA-VP-2 | GGTGGTGGTGGTGCTCGAGTTTATTCCATCTCTTTTCAAT     |                                                                                       |
| GmhB-VP-1 | AGCAAATGGGTCGCGGATCCTTGGC AAAACCTGCTGTTTTTAT | For the expression of GmhB <sub>VP</sub> from <i>V. parahaemolyticus</i> CGMCC 1.1997 |
| GmhB-VP-2 | GGTGGTGGTGGTGCTCGAGTTTATTTTGTAATAACGCTG      |                                                                                       |
| HldE-VP-1 | AGCAAATGGGTCGCGGATCCATGAAACCAATTCTACCTGAT    | For the expression of HldE <sub>VP</sub> from <i>V. parahaemolyticus</i> CGMCC 1.1997 |
| HldE-VP-2 | GGTGGTGGTGGTGCTCGAGTTTAGCCTTTGCCGCCTTTAAT    |                                                                                       |
| HldD-VP-1 | AGCAAATGGGTCGCGGATCCATGATCATCGTAACTGGTGG     | For the expression of HldD <sub>VP</sub> from <i>V. parahaemolyticus</i> CGMCC 1.1997 |
| HldD-VP-2 | GGTGGTGGTGGTGCTCGAGTTTAACTGTTTTGGATAGTTA     |                                                                                       |

**Table S3 Identity comparisons of the ADP- $\beta$ -D-manno-heptose synthetic enzymes from *Vibrio* strains and *E. coli*.**

|                    | GmhA <sub>VC</sub> | GmhB <sub>VC</sub> | HldE <sub>VC</sub> | HldD <sub>VC</sub> | GmhA <sub>VP</sub> | GmhB <sub>VP</sub> | HldE <sub>VP</sub> | HldD <sub>VP</sub> |
|--------------------|--------------------|--------------------|--------------------|--------------------|--------------------|--------------------|--------------------|--------------------|
| GmhA <sub>EC</sub> | 79                 | -                  | -                  | -                  | 78                 | -                  | -                  | -                  |
| GmhB <sub>EC</sub> | -                  | 62                 | -                  | -                  | -                  | 62                 | -                  | -                  |
| HldE <sub>EC</sub> | -                  | -                  | 70                 | -                  | -                  | -                  | 69                 | -                  |
| HldD <sub>EC</sub> | -                  | -                  | -                  | 74                 | -                  | -                  | -                  | 87                 |

Notes: Enzymes from *E. coli*, *V. cholerae* O1 2010EL-1786, and *V. parahaemolyticus* CGMCC 1.1997 are indicated with a subscript EC, VC, and VP, respectively.

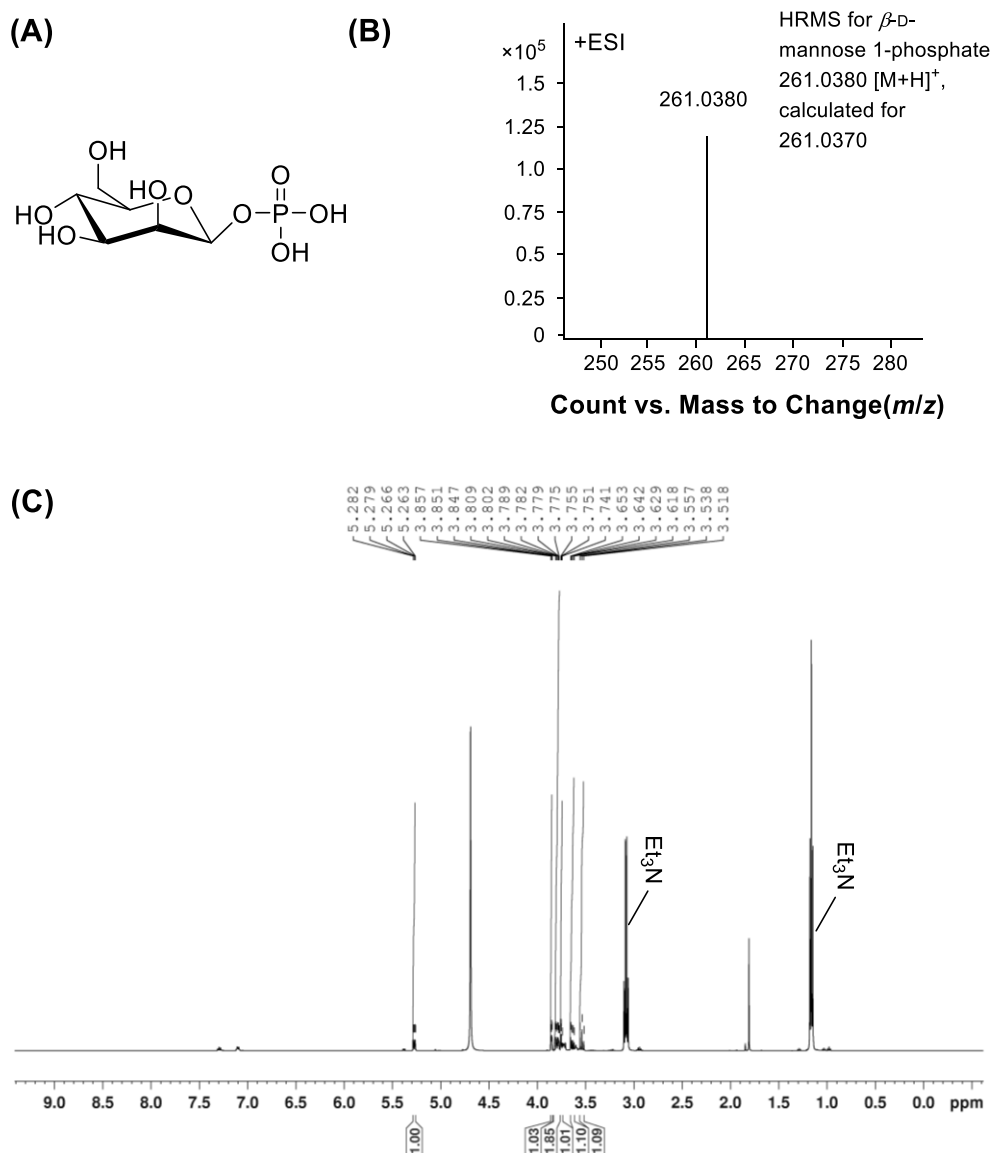

**Fig. S1-1 Spectral data of  $\beta$ -D-mannose 1-phosphate.** (A) Structure of  $\beta$ -D-mannose 1-phosphate. (B) HRMS spectrum of  $\beta$ -D-mannose 1-phosphate. (C)  $^1\text{H}$  NMR spectrum of  $\beta$ -D-mannose 1-phosphate.

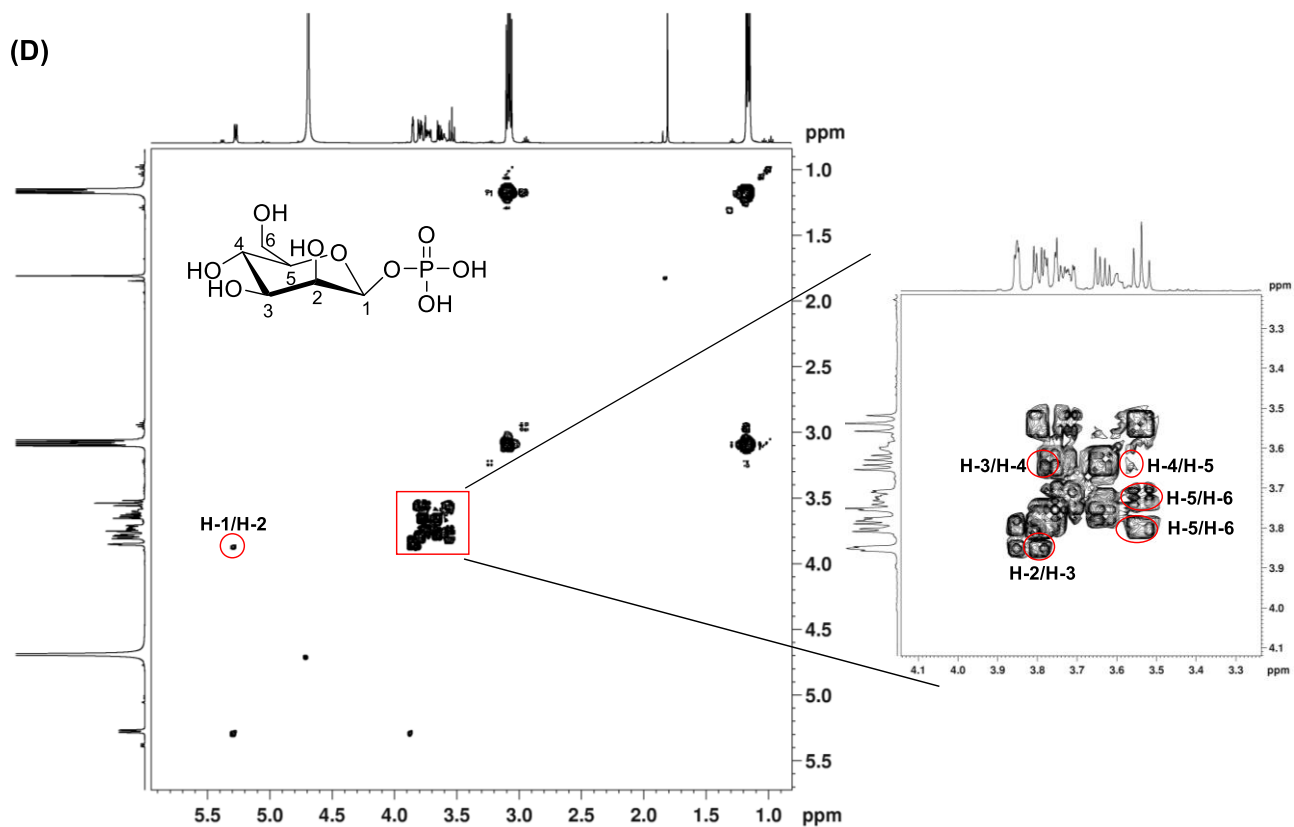

**Fig. S1-2** Spectral data of  $\beta$ -D-mannose 1-phosphate. (D)  $^1\text{H}$ - $^1\text{H}$  COSY spectrum of  $\beta$ -D-mannose 1-phosphate. The key  $^1\text{H}$ - $^1\text{H}$  COSY correlations are marked on the structure of  $\beta$ -D-mannose 1-phosphate with black bold lines and at the spectrum with red circles.



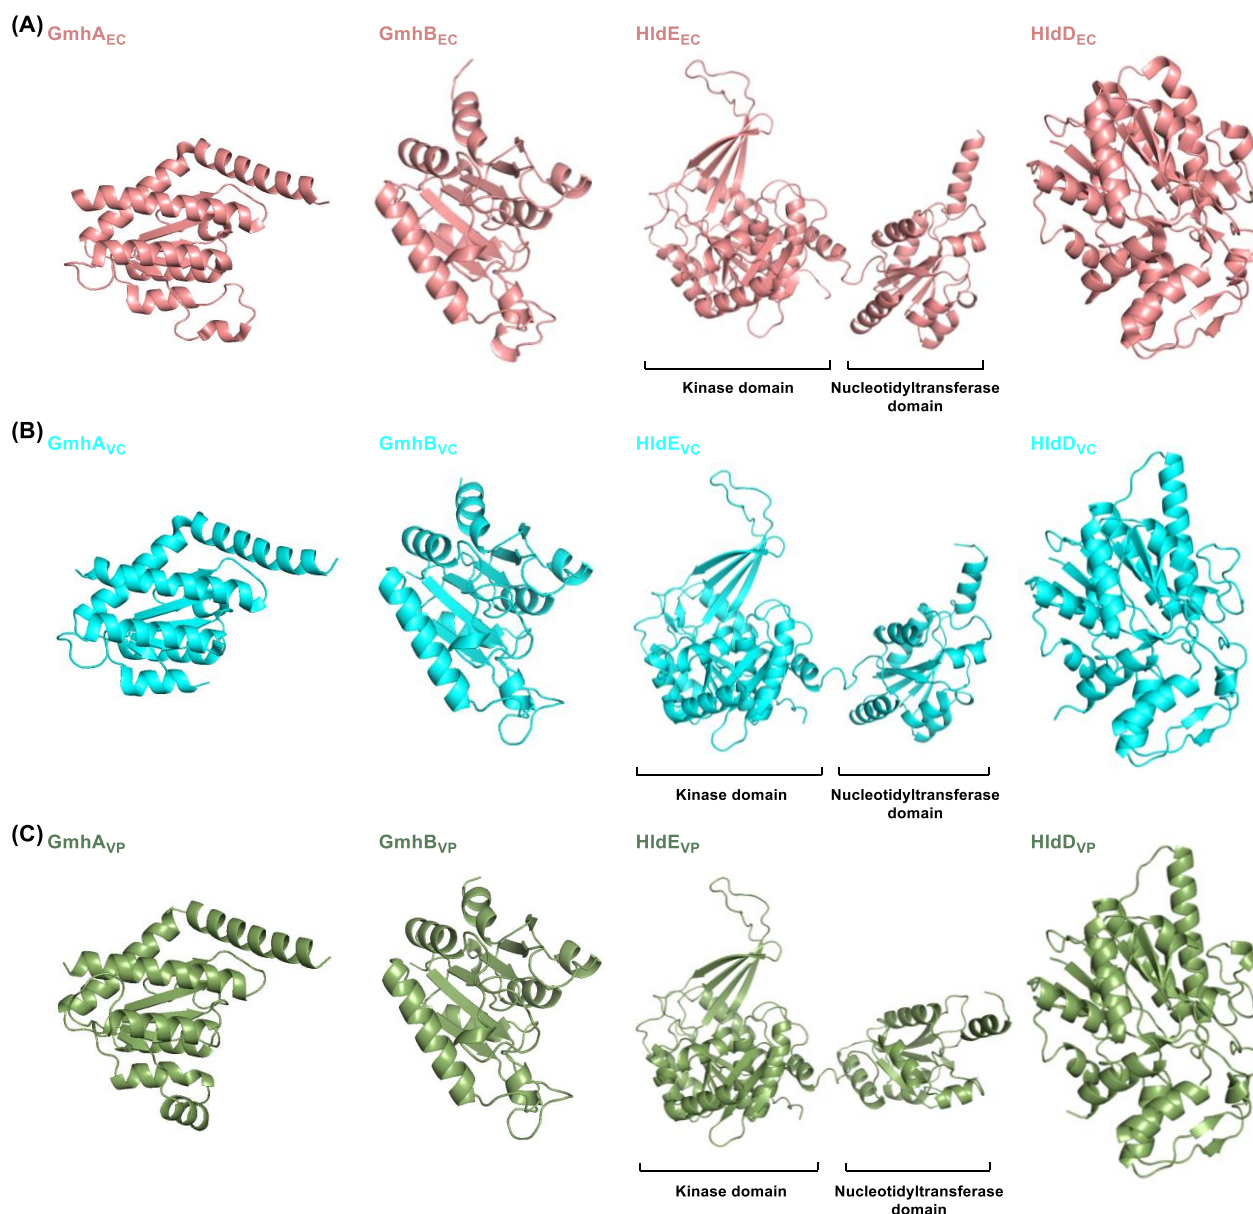

**Fig. S2 The protein structures of ADP- $\beta$ -D-manno-heptose biosynthetic enzymes from *E. coli* and *Vibrio* strains.** (A) The crystal or predicted protein structure monomers of GmhA<sub>EC</sub>, GmhB<sub>EC</sub>, HldE<sub>EC</sub>, and HldD<sub>EC</sub> from *E. coli*; (B) The crystal or predicted protein structure monomers of GmhA<sub>VC</sub>, GmhB<sub>VC</sub>, HldE<sub>VC</sub>, and HldD<sub>VC</sub> from *V. cholerae* O1 2010EL-1786. (C) The predicted protein structure monomers of GmhA<sub>VP</sub>, GmhB<sub>VP</sub>, HldE<sub>VP</sub>, and HldD<sub>VP</sub> from *V. parahaemolyticus* CGMCC 1.1997. The crystal structures GmhA<sub>EC</sub> (PDB code: 212W), HldD<sub>EC</sub> (PDB code: 1EQ2), and GmhA<sub>VC</sub> (PDB code: 1X94) were determined (Seetharaman et al. 2006; Taylor et al. 2008; Deacon et al. 2000) and the protein structures of the other ADP- $\beta$ -D-manno-heptose biosynthetic enzymes were predicted by AlphaFold.

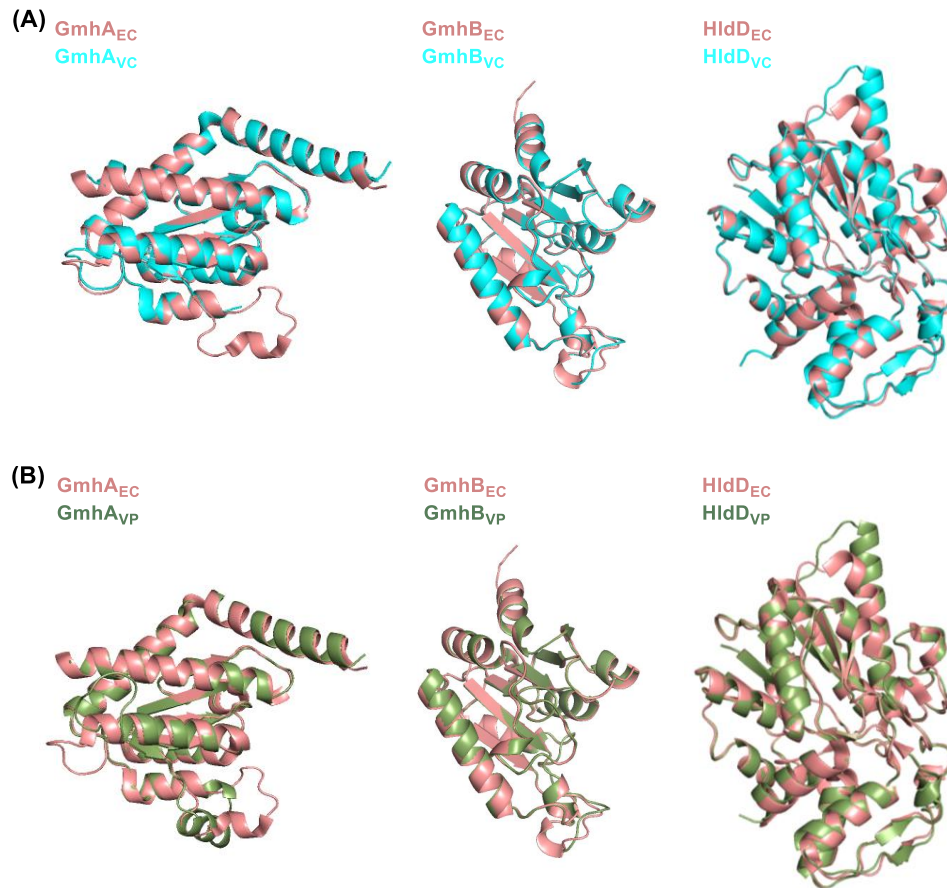

**Fig. S3 Structural superimposition of the ADP- $\beta$ -D-manno-heptose biosynthetic enzymes from *Vibrio* strains with *E. coli*.** (A) Pairwise structural comparison of GmhA<sub>VC</sub> with GmhA<sub>EC</sub>, GmhB<sub>VC</sub> with GmhB<sub>EC</sub>, and HldD<sub>VC</sub> with HldD<sub>EC</sub>. (B) Pairwise structural comparison of GmhA<sub>VP</sub> with GmhA<sub>EC</sub>, GmhB<sub>VP</sub> with GmhB<sub>EC</sub>, HldD<sub>VP</sub> with HldD<sub>EC</sub>. The ADP- $\beta$ -D-manno-heptose biosynthetic enzymes from *E. coli*, *V. cholerae* O1 2010EL-1786, *V. parahaemolyticus* CGMCC 1.1997 are indicated with a subscript of EC, VC, and VP, respectively.

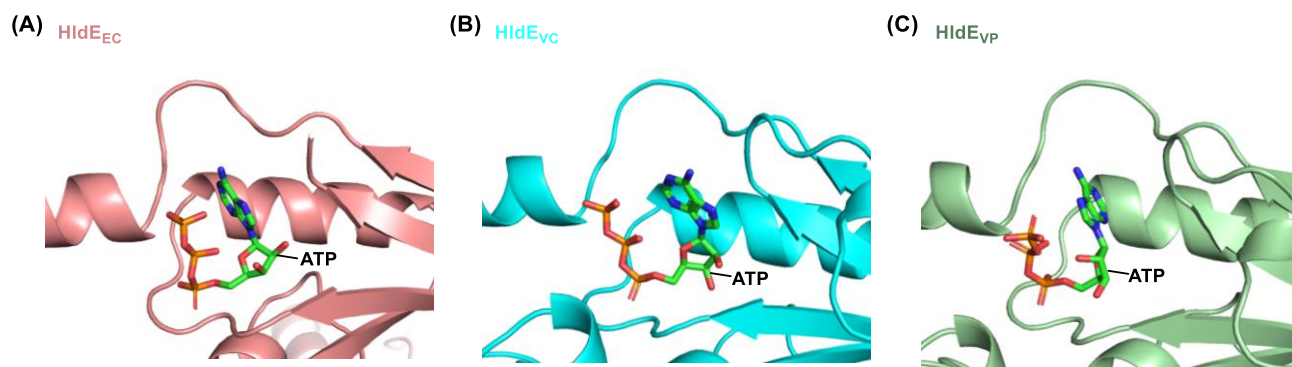

**Fig. S4 The docking results of ATP in the substrate binding pockets of nucleotidyltransferase domains of HldEs.** (A) The ‘horseshoe’ binding model of ATP in HldE<sub>EC</sub>-ATP; (B) The ‘horseshoe’ binding model of ATP in HldE<sub>VC</sub>-ATP; (C) The ‘horseshoe’ binding model of ATP in HldE<sub>VP</sub>-ATP.

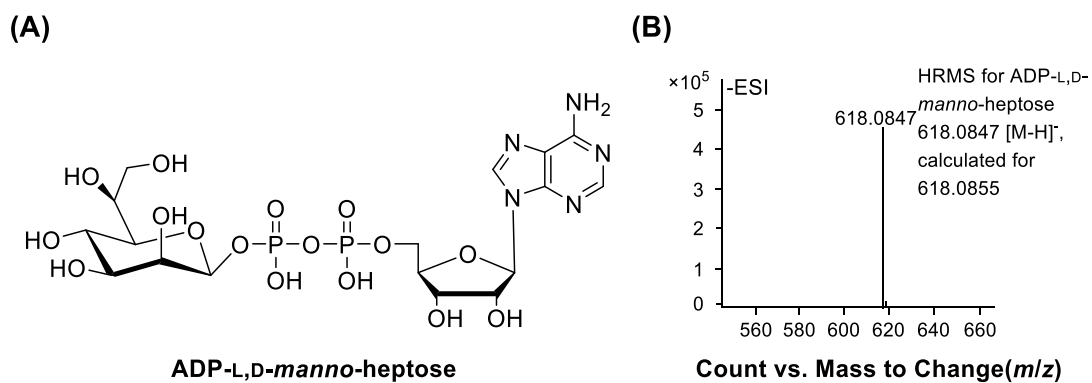

**Fig. S5 HRMS data of ADP-L,D-*manno*-heptose.** (A) Structure of ADP-L,D-*manno*-heptose. (B) HRMS spectrum of ADP-L,D-*manno*-heptose prepared from the HldD<sub>VC</sub> reaction.

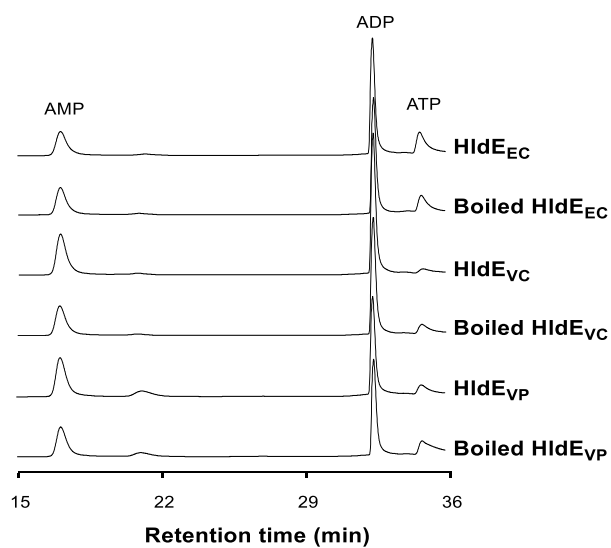

**Fig. S6 HPLC profiles of the enzymatic assays catalyzed by the nucleotidyltransferase domain of HldEs using  $\alpha$ -D-mannose 1-phosphate and ATP as substrates.** The detection wavelength was set as 254 nm. HldE<sub>EC</sub>, HldE<sub>VC</sub>, and HldE<sub>VP</sub> are bifunctional kinase/nucleotidyltransferases from *E. coli* BL21, *V. cholerae* O1 2010EL-1786, and *V. parahaemolyticus* CGMCC 1.1997, respectively.

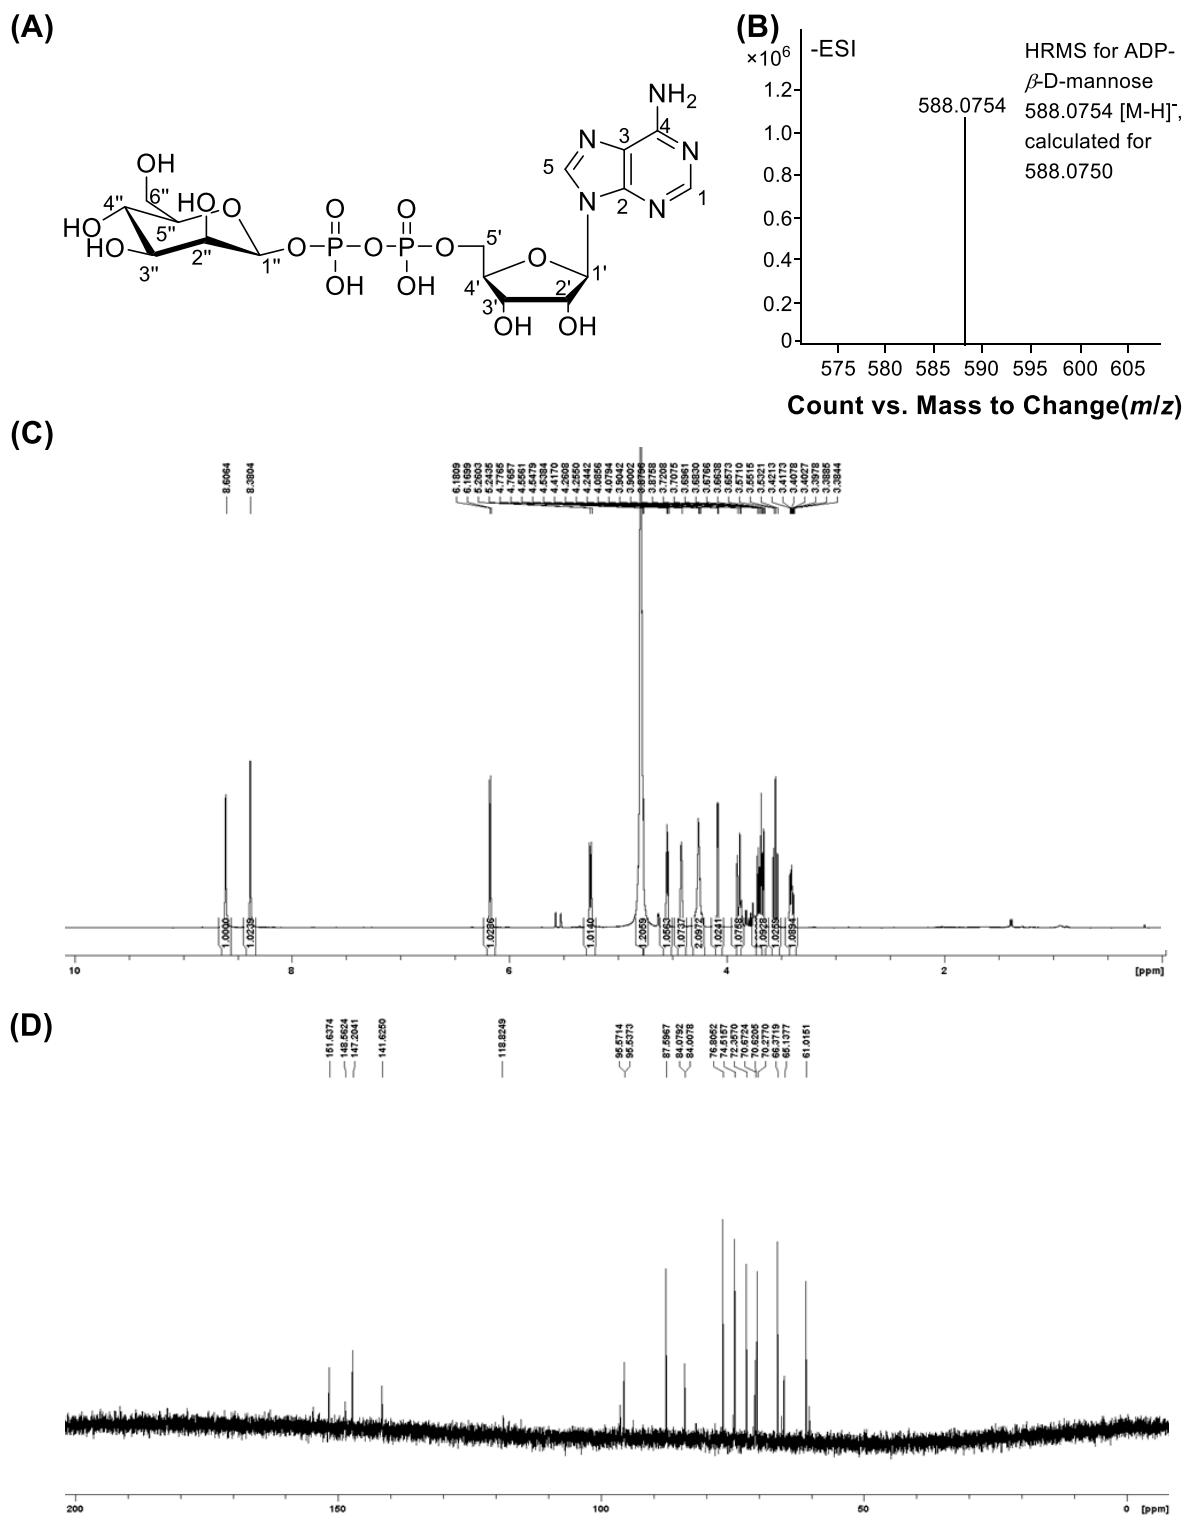

**Fig. S7-1 Spectral data of ADP- $\beta$ -D-mannose.** (A) Structure of ADP- $\beta$ -D-mannose. (B) HRMS spectrum of ADP- $\beta$ -D-mannose. (C) <sup>1</sup>H NMR spectrum of ADP- $\beta$ -D-mannose. (D) <sup>13</sup>C NMR spectrum of ADP- $\beta$ -D-mannose.

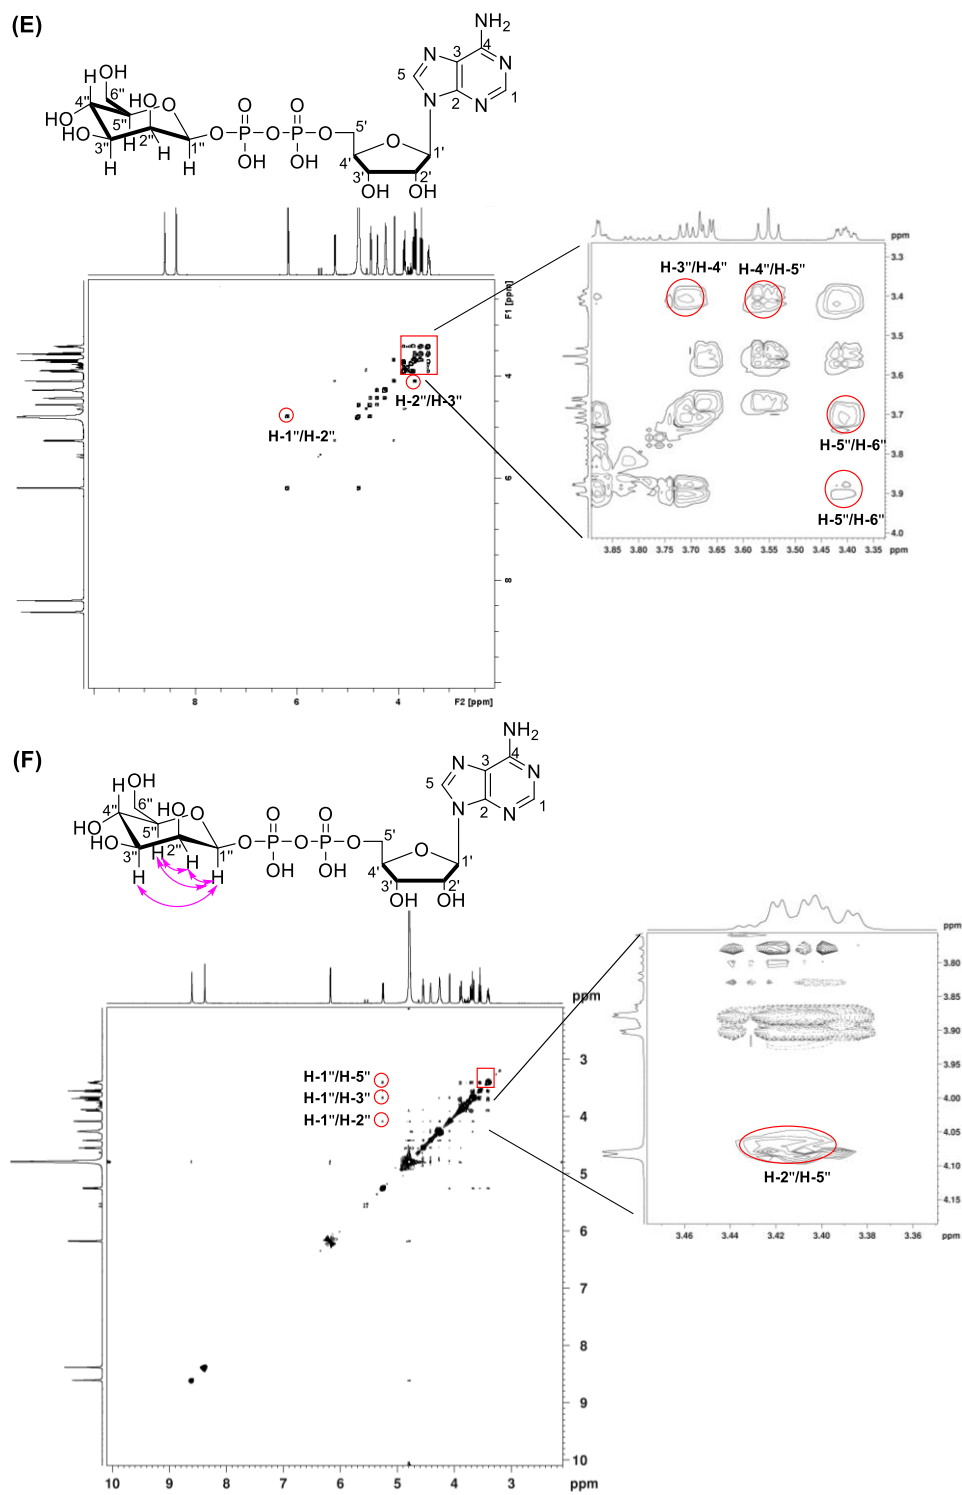

**Fig. S7-2 Spectral data of ADP- $\beta$ -D-mannose.** (E)  $^1\text{H}$ - $^1\text{H}$  COSY spectrum of ADP- $\beta$ -D-mannose. (F) NOE spectrum of ADP- $\beta$ -D-mannose. The key  $^1\text{H}$ - $^1\text{H}$  COSY correlations are marked on the structure of ADP- $\beta$ -D-mannose with black bold lines and at the spectrum with red circles. The key NOE correlations are marked on the structure of ADP- $\beta$ -D-mannose with pink arrows and at the spectrum with red circles.

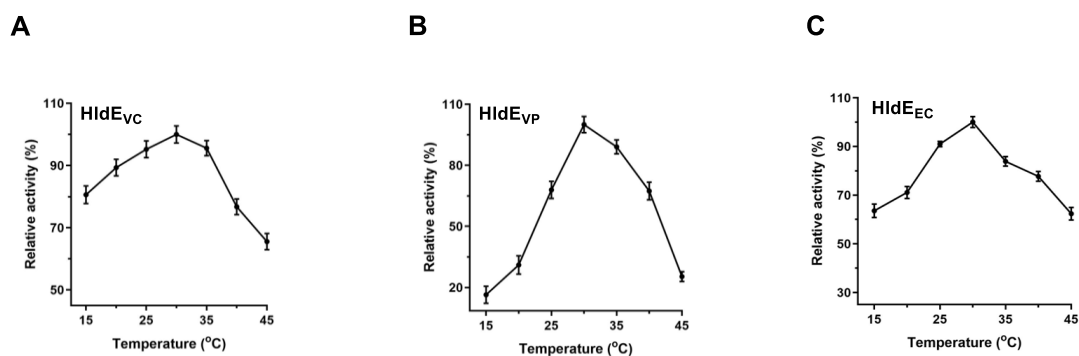

**Fig. S8 Determination of the optimal temperatures of HldE<sub>VC</sub>, HldE<sub>VP</sub>, and HldE<sub>EC</sub>.** (A) The effect of temperature on HldE<sub>VC</sub> activity. (B) The effect of temperature on HldE<sub>VP</sub> activity. (C) The effect of temperature on HldE<sub>EC</sub> activity. All the reactions were performed in a 50  $\mu$ L volume mixture containing 2 mM MgCl<sub>2</sub>, 0.2 mM ATP, 0.2 mM  $\beta$ -D-mannose 1-phosphate, 5  $\mu$ M HldE, and 0.1 U PPase at their optimal pH values (HldE<sub>VC</sub>, pH 8.5; HldE<sub>VP</sub>, pH 8.0; HldE<sub>EC</sub>, pH 7.5) for 0.5 h. All the reactions were detected using the colorimetric assay. Values and error bars represented means and standard deviations of biological triplicates.

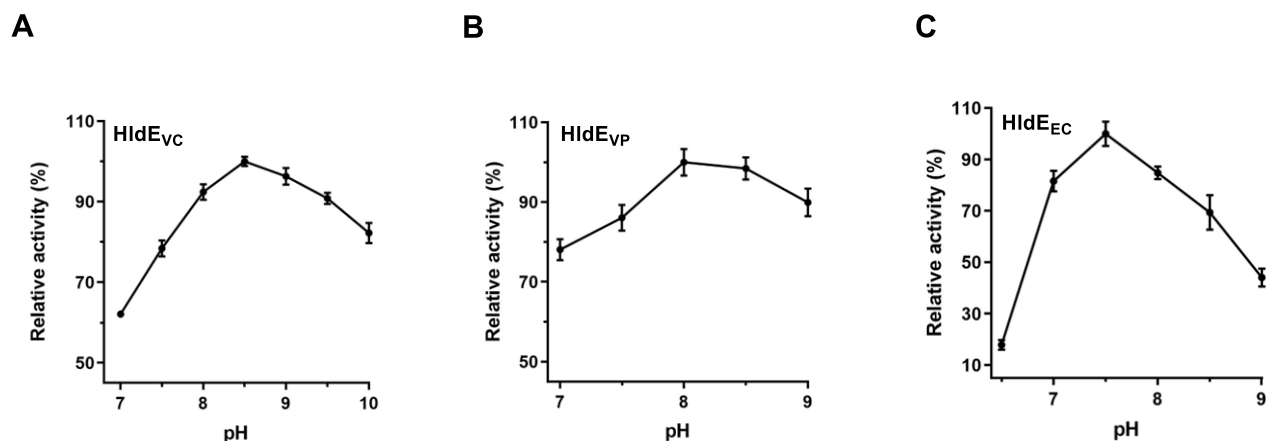

**Fig. S9 Determination of the optimal pHs of HldE<sub>VC</sub>, HldE<sub>VP</sub>, and HldE<sub>EC</sub>.** (A) The effect of pH on HldE<sub>VC</sub> activity. (B) The effect of pH on HldE<sub>VP</sub> activity. (C) The effect pH of on HldE<sub>EC</sub> activity. All the reactions were performed in a 50  $\mu$ L volume mixture containing 2 mM MgCl<sub>2</sub>, 0.2 mM ATP, 0.2 mM  $\beta$ -D-mannose 1-phosphate, 5  $\mu$ M HldE, and 0.1 U PPase at 30 °C for 0.5 h. All the reactions were monitored using the colorimetric assay. Values and error bars represented means and standard deviations of biological triplicates.



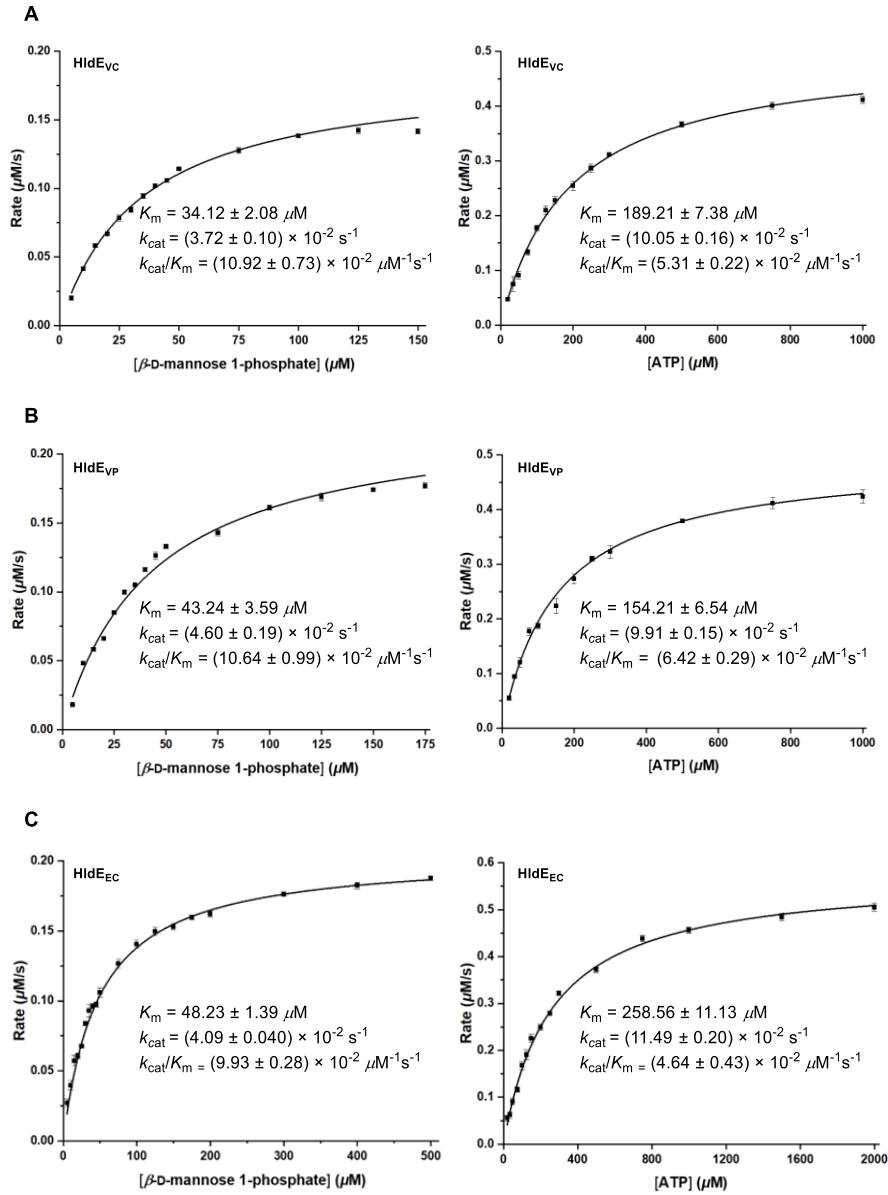

**Fig. S10 The steady-state kinetic analyses of HldE<sub>VC</sub>, HldE<sub>VP</sub>, and HldE<sub>EC</sub>.** (A) The kinetic parameters of HldE<sub>VC</sub> against  $\beta$ -D-mannose 1-phosphate (left) and ATP (right). (B) The kinetic parameters of HldE<sub>VP</sub> against  $\beta$ -D-mannose 1-phosphate (left) and ATP (right). (C) The kinetic parameters of HldE<sub>EC</sub> against  $\beta$ -D-mannose 1-phosphate (left) and ATP (right). Values and error bars represented means and standard deviations of biological triplicates.

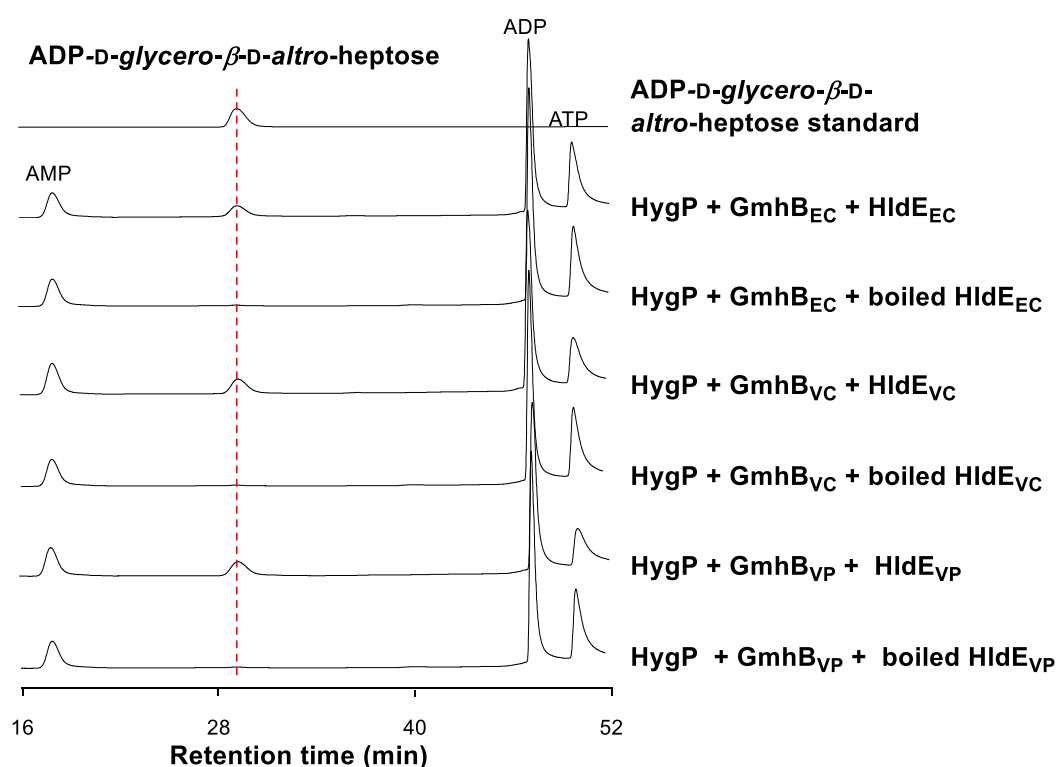

**Fig. S11 HPLC profiles of the enzymatic assays of ADP-D-glycero- $\beta$ -D-altro-heptose catalyzed by HygP and the *Vibrio* enzymes.** HygP is an isomerase from *Streptomyces hygroscopicus* DSM 40578. The ADP- $\beta$ -D-manno-heptose biosynthetic enzymes from *E. coli*, *V. cholerae* O1 2010EL-1786, *V. parahaemolyticus* CGMCC 1.1997 are indicated with a subscript of EC, VC, and VP, respectively. The detection wavelength was set as 254 nm.

## References

- Deacon, A. M., Ni, Y. S., Coleman, W. G., and Ealick, S. E. (2000). The crystal structure of ADP-L-glycero-D-manno-heptose 6-epimerase: catalysis with a twist. *Structure* 8(5): 453-462. doi:10.1016/s0969-2126(00)00128-3
- Sabesan S, Neira S (1992) Synthesis of glycosyl phosphates and azides. *Carbohydr Res* 223:169-185. doi:10.1016/0008-6215(92)80015-s
- Seetharaman J, Rajashankar KR, Solorzano V, Kniewel R, Lima CD, Bonanno JB, Burley SK, Swaminathan S (2006) Crystal structures of two putative phosphoheptose isomerases. *Proteins Struct Funct Bioinform* 63(4):1092-1096. doi: 10.1002/prot.20908
- Taylor PL, Blakely KM, de Leon GP, Walker JR, McArthur F, Evdokimova E, Zhang K, Valvano MA, Wright GD, Junop MS (2008) Structure and function of sedoheptulose-7-phosphate isomerase, a critical enzyme for lipopolysaccharide biosynthesis and a target for antibiotic adjuvants. *J Biol Chem* 283(5):2835-2845. doi:10.1074/jbc.M706163200
- Tang W, Guo Z, Cao Z, Wang M, Li P, Meng X, Zhao X, Xie Z, Wang W, Zhou A, Lou C, Chen Y (2018) D-Sedoheptulose-7-phosphate is a common precursor for the heptoses of septacidin and hygromycin B. *Proc Natl Acad Sci U S A* 115(11):2818-2823. doi:10.1073/pnas.1711665115
- Tang Y, Tang W, Wang M, Zhang Z, Chen Y (2022) A conservative distribution of tridomain NDP-heptose synthetases in actinobacteria. *Sci China Life Sci* 65(5):1014-1023. doi:10.1007/s11427-021-2000-2
